# Supplementary material
Source: PubMed Central journal article supplement (PMC4859711)
Supplement: JVI.02851-15_zjv999091625so1.pdf [file JVI.02851-15_zjv999091625so1.pdf]

368/385

|        |                          |   |   |   |   |   |   |   |   |   |   |   |   |   |   |
|--------|--------------------------|---|---|---|---|---|---|---|---|---|---|---|---|---|---|
| HIV-1  | HIV-1 (HXB) Clade-B      | S | G | G | D | P | E | I | V | T | H | S | F | N | C |
|        | HIV-1 (Plum) Clade-A     | S | G | G | D | P | E | V | T | T | H | S | F | N | C |
|        | HIV-1 (EI55748) Clade-C  | S | G | G | D | L | E | V | T | T | H | S | F | N | C |
|        | HIV-1 (DGOB) Clade-D     | S | G | G | D | P | E | I | T | T | H | M | F | N | C |
|        | HIV-1 (AAB06205) Clade-E | S | G | G | D | L | E | I | T | M | H | H | F | N | C |
| HIV-2  | HIV-1 (PCMO2.3) Group O  | S | G | G | D | P | E | I | T | Q | L | H | F | N | C |
|        | HIV-2- ROD               | K | G | S | D | P | E | V | A | Y | M | W | T | N | C |
| SIVcpz | SIVcpz- TAN1             | R | D | G | D | P | E | V | T | S | F | W | F | N | C |
|        | SIVcpz- ANT              | Q | D | G | D | P | E | V | K | V | H | W | F | N | C |
|        | SIVcpz- GAB1             | S | G | G | D | P | E | V | T | H | H | M | F | N | C |
|        | SIVcpz- CAM3             | P | G | G | D | P | E | V | T | N | M | M | F | N | C |
| SIV    | SIVmac- 239              | G | G | G | D | P | E | V | T | F | M | W | T | N | C |
|        | SIVsm- 543               | A | G | G | D | P | E | V | T | F | M | W | T | N | C |
|        | SIVagm- VER3             | L | F | G | D | P | E | A | A | N | L | W | F | N | C |
|        | SIVagm- TYO              | Q | W | G | D | P | E | A | S | N | L | W | F | N | C |
|        | SIVagm- TAN1             | Q | W | G | D | P | E | A | A | N | I | W | L | N | C |
|        | SIVagm- SAB1             | Q | W | G | D | P | E | S | E | F | F | F | F | N | C |
|        | SIVrcm- GB1              | Y | G | G | D | D | E | A | R | Y | F | W | L | N | C |
|        | SIVdrl- FAO              | T | K | G | D | L | A | S | E | N | L | M | M | L | C |
|        | SIVgsn- 99CM166          | P | K | G | D | L | E | V | Q | T | H | W | F | Q | C |
|        | SIVden                   | V | G | G | D | P | E | T | S | S | A | R | F | Q | C |
|        | SIVdeb- CM5              | P | G | G | D | R | E | V | Q | N | T | W | F | Q | C |
|        | SIVdeb- CM40             | P | K | G | D | R | E | V | Q | S | V | W | F | Q | C |
|        | SIVsyk- KE5              | P | Q | G | D | L | E | V | R | T | H | W | F | Q | C |
|        | SIVsyk -173              | P | G | G | D | L | E | V | R | T | H | W | F | Q | C |
|        | SIVmon                   | P | Q | G | D | K | E | V | Q | T | H | W | F | N | C |
|        | SIVmus- 1085             | P | K | G | D | Q | E | V | Q | T | H | W | F | N | C |
|        | SIVcol- CGU              | R | T | S | D | P | E | A | T | F | T | F | V | I | C |
|        | SIVsun- L14              | H | G | A | D | A | A | T | E | M | L | M | M | T | C |
|        | SIVl'hst- 7              | H | G | A | D | L | A | T | E | M | L | M | H | T | C |
|        | SIVmnd- GB1              | T | S | G | D | R | A | A | E | M | M | M | M | T | C |
|        | SIVmnd- 14               | T | I | G | E | P | G | A | E | T | I | M | I | L | C |
|        | SIVmnd- 2                | T | K | G | E | P | G | A | E | T | I | M | L | L | C |

**Supplemental Figure 1: Amino acid sequence alignment of HIV-1, HIV-2, and SIV gp120.** Shown is a region that for HIV-1 contributes to the CD4 binding site. Aspartic acid-368 for HIV-1, which is critical for CD4 binding (i.e., D-385 for SIVmac239), is highlighted and is highly conserved with the only exception being two SIVmnd isolates.

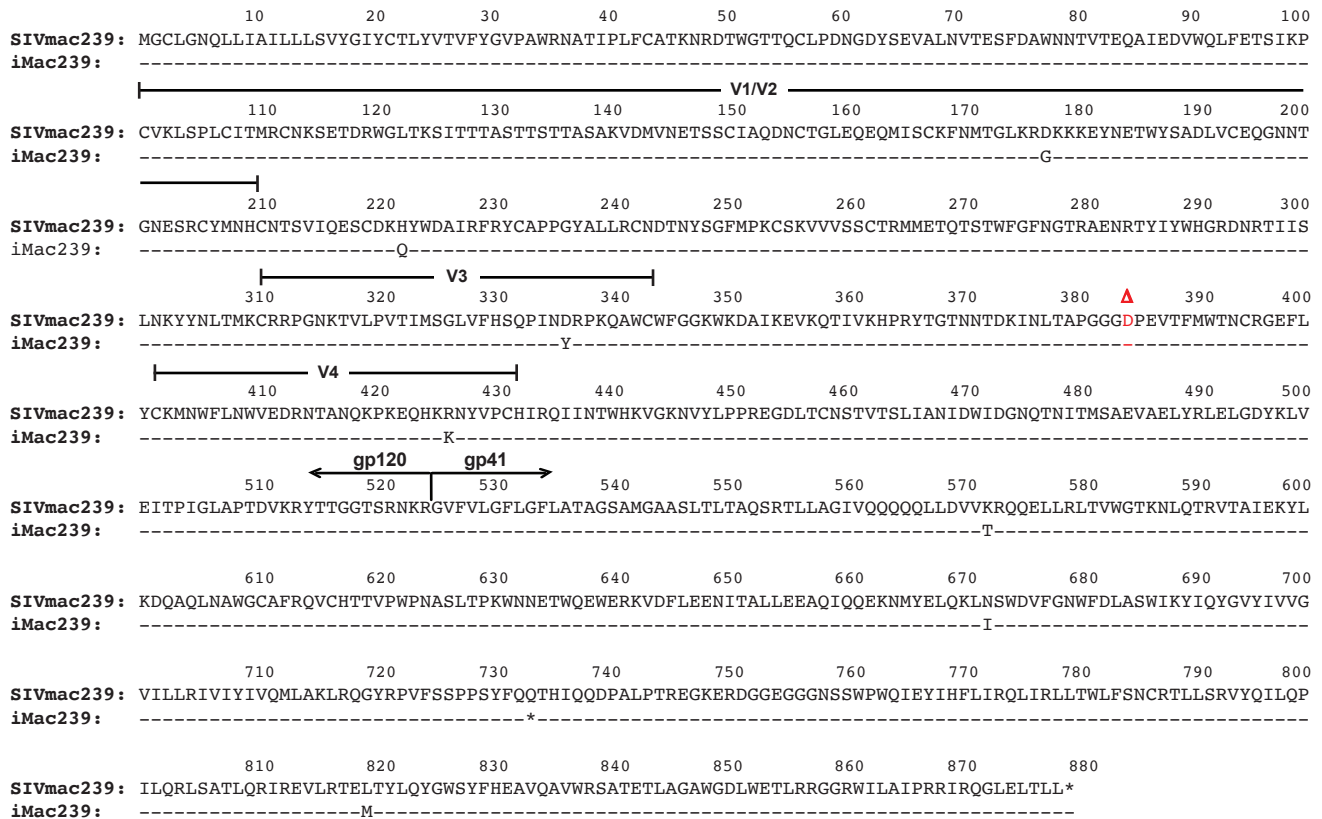

**Supplemental Figure 2: Alignment of Env sequences for SIVmac239 and iMac239 are shown.** Variable loops and the cleavage site for gp120 and gp41 are indicated. Stop codons are denoted by asterisks (\*). A stop codon at position 734 in the gp41 cytoplasmic tail, acquired as expected (76) during in vitro passaging of iMac239 in human T cell lines and present in the p8cl18 env clone, was repaired to create the iMac239 Env. The red delta ( $\Delta$ ) symbol at position 385 denotes the site of mutagenesis to remove D385 within the CD4 binding site.

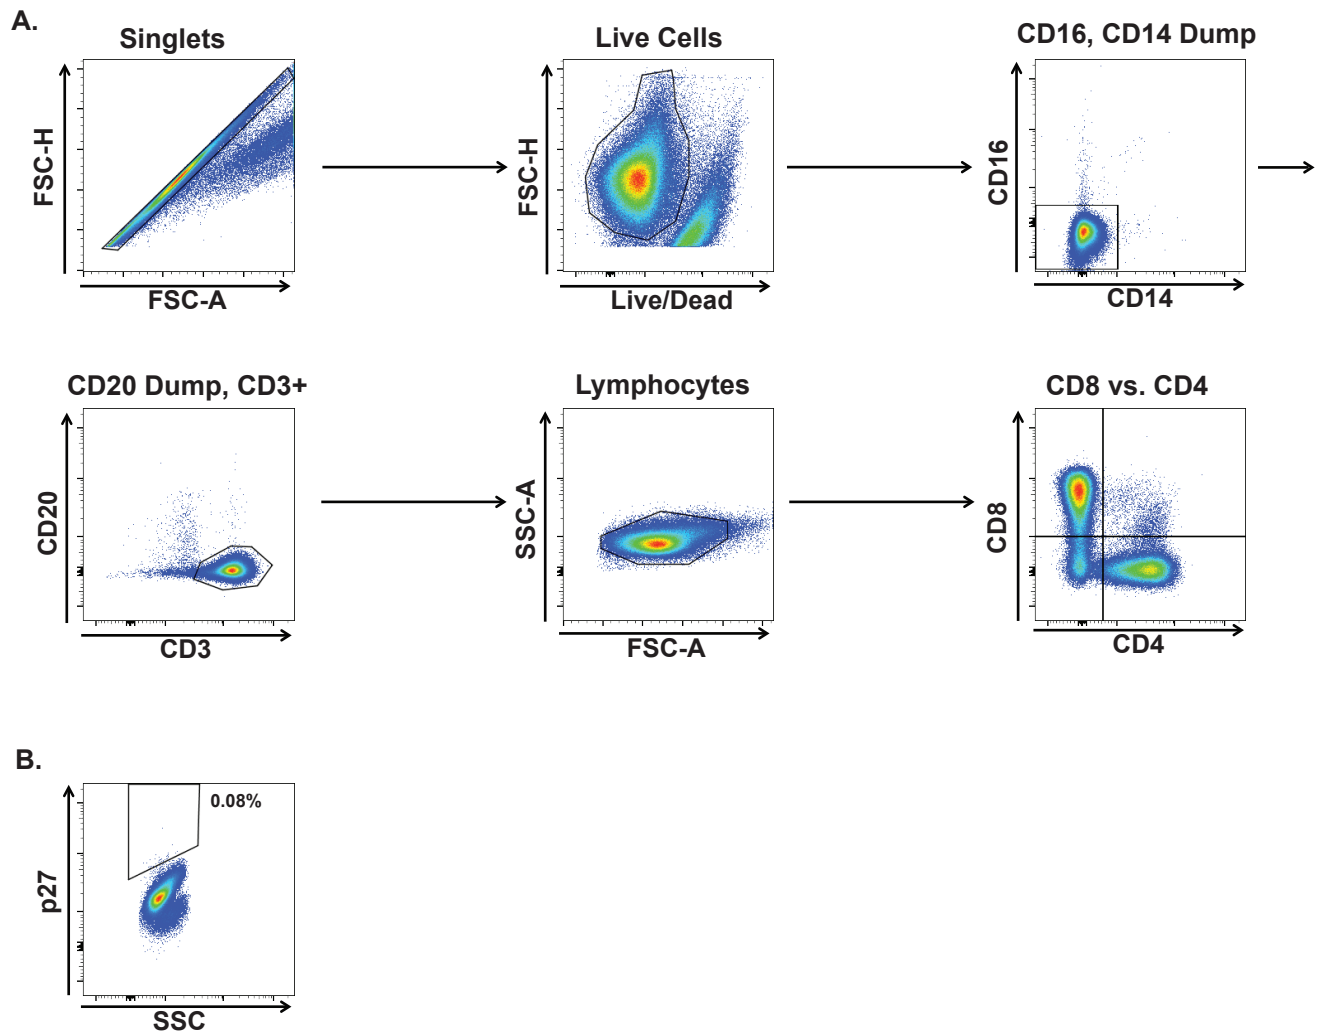

**Supplemental Figure 3: The flow cytometry gating strategy is shown for analysis of SIV-infected PBMCs.** Monoclonal antibodies included those reactive with CD3, CD4, CD8, CD20, CD14, CD16 and SIV p27 Gag. **(A)** Gating strategy is shown for CD4<sup>+</sup> and CD8<sup>+</sup> T cells. Shown are cytograms for uninfected cells. **(B)** A representative cytogram of uninfected cells is shown to demonstrate negligible staining for p27 Gag.
